# Supplementary material for: NiO-nanoflakes grafted graphene: an excellent photocatalyst and a novel nanomaterial for achieving complete pathogen control
Source: Royal Society of Chemistry journal article supplement (doi:10.1039/c7nr05756c), 2017-01-01
Supplement: c7nr05756c1.pdf [file c7nr05756c1.pdf]

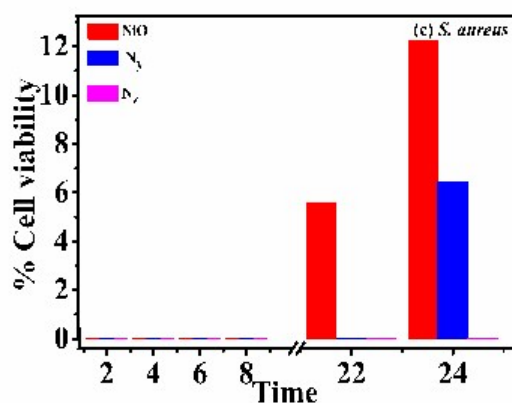

ESI Fig 2(a)-(c): The cell viabilities of three bacterial strains after treatment with NiO, N<sub>γ</sub> and N<sub>z</sub>

The cell viabilities depict the bactericidal effect of N<sub>z</sub> nanocomposite. It is evident from the Figure 2(a)-(c) that all the three bacteria were unable to grow right from the very beginning of the experiment till 24 hours. Though NiO and N<sub>γ</sub> also has also shown inhibition of bacterial growth but a complete microbial control is achieved by N<sub>z</sub>.
